# Supplementary material for: SDS-PAGE-Based Quantitative Assay of Hemolymph Proteins in Honeybees: Progress and Prospects for Field Application
Source: MDPI journal article supplement (doi:10.3390/ijms241210216), 2023-06-16
Supplement: s1 [file s1]

**Supplementary Table S1.** Total proteins (TP), apolipophorin-I (ApoLp-I), vitellogenin (Vg), apolipophorin-II (ApoLp-II), transferrin (Tf) and hexamerin 70a (Hex-70a) determined in haemolymph of honeybees sampled from colonies of four apiaries located in the province of Bologna (A, B, C, and D) in different months (April, May, July, a November). Data are expressed in mg/mL and are reported as mean  $\pm$  SD (n = 3).

|                |   | April                | May                    | July               | November           |
|----------------|---|----------------------|------------------------|--------------------|--------------------|
| TP mg/mL       | A | 12.7 $\pm$ 6.23a     | 23.3 $\pm$ 4.49b,c,d * | 19.6 $\pm$ 1.70a,c | 53.8 $\pm$ 12.2b,d |
|                | B | 12.6 $\pm$ 3.94a     | 13.3 $\pm$ 1.53a,b *   | 20.4 $\pm$ 5.95a,b | 49.7 $\pm$ 8.53b   |
|                | C | 13.5 $\pm$ 0.36a     | 44.5 $\pm$ 7.50a,b†    | 21.7 $\pm$ 3.58a,b | 63.1 $\pm$ 3.49b   |
|                | D | 13.6 $\pm$ 3.75a     | 24.6 $\pm$ 9.36a,b *   | 21.6 $\pm$ 9.46a   | 51.1 $\pm$ 10.5b   |
| ApoLp-I mg/mL  | A | 2.18 $\pm$ 0.51      | 2.03 $\pm$ 3.51        | 7.16 $\pm$ 8.36    | 8.18 $\pm$ 1.97    |
|                | B | 2.37 $\pm$ 2.55a,b   | 0.00 $\pm$ 0.00a       | 3.30 $\pm$ 3.26a,b | 11.4 $\pm$ 0.57b   |
|                | C | 0.67 $\pm$ 0.82      | 10.0 $\pm$ 0.75        | 5.23 $\pm$ 2.50    | 8.24 $\pm$ 1.60    |
|                | D | 6.56 $\pm$ 5.82      | 2.49 $\pm$ 2.98        | 3.12 $\pm$ 7.14    | 8.73 $\pm$ 7.01    |
| Vg mg/mL       | A | 0.69 $\pm$ 0.60a     | 3.44 $\pm$ 5.95a,b     | 11.9 $\pm$ 11.9a,b | 33.9 $\pm$ 7.13b   |
|                | B | 0.54 $\pm$ 0.66a     | 0.00 $\pm$ 0.00a,b     | 5.70 $\pm$ 5.59a,b | 41.5 $\pm$ 10.9b   |
|                | C | 0.39 $\pm$ 0.67a     | 17.5 $\pm$ 1.25a       | 12.2 $\pm$ 6.75a,b | 38.8 $\pm$ 6.95b   |
|                | D | 3.45 $\pm$ 3.51      | 1.05 $\pm$ 0.36        | 9.33 $\pm$ 16.2    | 35.4 $\pm$ 26.6    |
| ApoLp-II mg/mL | A | 1.97 $\pm$ 0.45      | 0.29 $\pm$ 0.50        | 2.40 $\pm$ 0.62    | 1.94 $\pm$ 0.54    |
|                | B | 0.82 $\pm$ 0.49a,b   | 0.25 $\pm$ 0.03a,b     | 0.81 $\pm$ 0.36a   | 2.06 $\pm$ 0.18b   |
|                | C | 0.79 $\pm$ 0.39      | 1.68 $\pm$ 0.17        | 2.02 $\pm$ 0.83    | 1.79 $\pm$ 0.21    |
|                | D | 2.39 $\pm$ 0.82      | 1.05 $\pm$ 0.36        | 1.41 $\pm$ 2.44    | 1.21 $\pm$ 0.74    |
| Tf mg/mL       | A | 0.39 $\pm$ 0.25a,b   | 0.29 $\pm$ 0.50a       | 1.24 $\pm$ 0.37a,b | 2.58 $\pm$ 0.51b   |
|                | B | 0.18 $\pm$ 0.08a,b,c | 0.07 $\pm$ 0.01a       | 0.56 $\pm$ 0.13b   | 2.32 $\pm$ 0.56c   |
|                | C | 0.21 $\pm$ 0.1       | 2.50 $\pm$ 1.29        | 0.99 $\pm$ 0.31    | 3.18 $\pm$ 0.54    |
|                | D | 0.57 $\pm$ 0.49      | 1.10 $\pm$ 0.27        | 0.74 $\pm$ 1.29    | 2.25 $\pm$ 0.72    |
| Hex-70a mg/mL  | A | 1.55 $\pm$ 1.25      | 0.56 $\pm$ 0.97        | 2.63 $\pm$ 1.36    | 5.36 $\pm$ 1.31    |
|                | B | 0.71 $\pm$ 0.33a     | 0.24 $\pm$ 0.02a       | 1.21 $\pm$ 0.74a   | 4.46 $\pm$ 1.14b   |
|                | C | 0.54 $\pm$ 0.27      | 4.40 $\pm$ 0.14        | 2.37 $\pm$ 1.14    | 6.11 $\pm$ 0.40    |
|                | D | 1.42 $\pm$ 1.32      | 1.70 $\pm$ 1.13        | 1.41 $\pm$ 2.44    | 4.72 $\pm$ 0.49    |

For each analyte, different lower-case letters within rows indicates significant differences (p<0.05) among time-points within each apiary.

For each analyte, the different symbols (\*; †) within columns indicates significant differences (p<0.05) among apiaries within each time-point.
